# Supplementary material for: Sensitivity Analysis of Flux Determination in Heart by H218O -provided Labeling Using a Dynamic Isotopologue Model of Energy Transfer Pathways
Source: PLOS journal article supplement (doi:10.1371/journal.pcbi.1002795), 2012-12-06

A

Figure S2A — Step to 30%  $\text{H}_2^{18}\text{O}$ .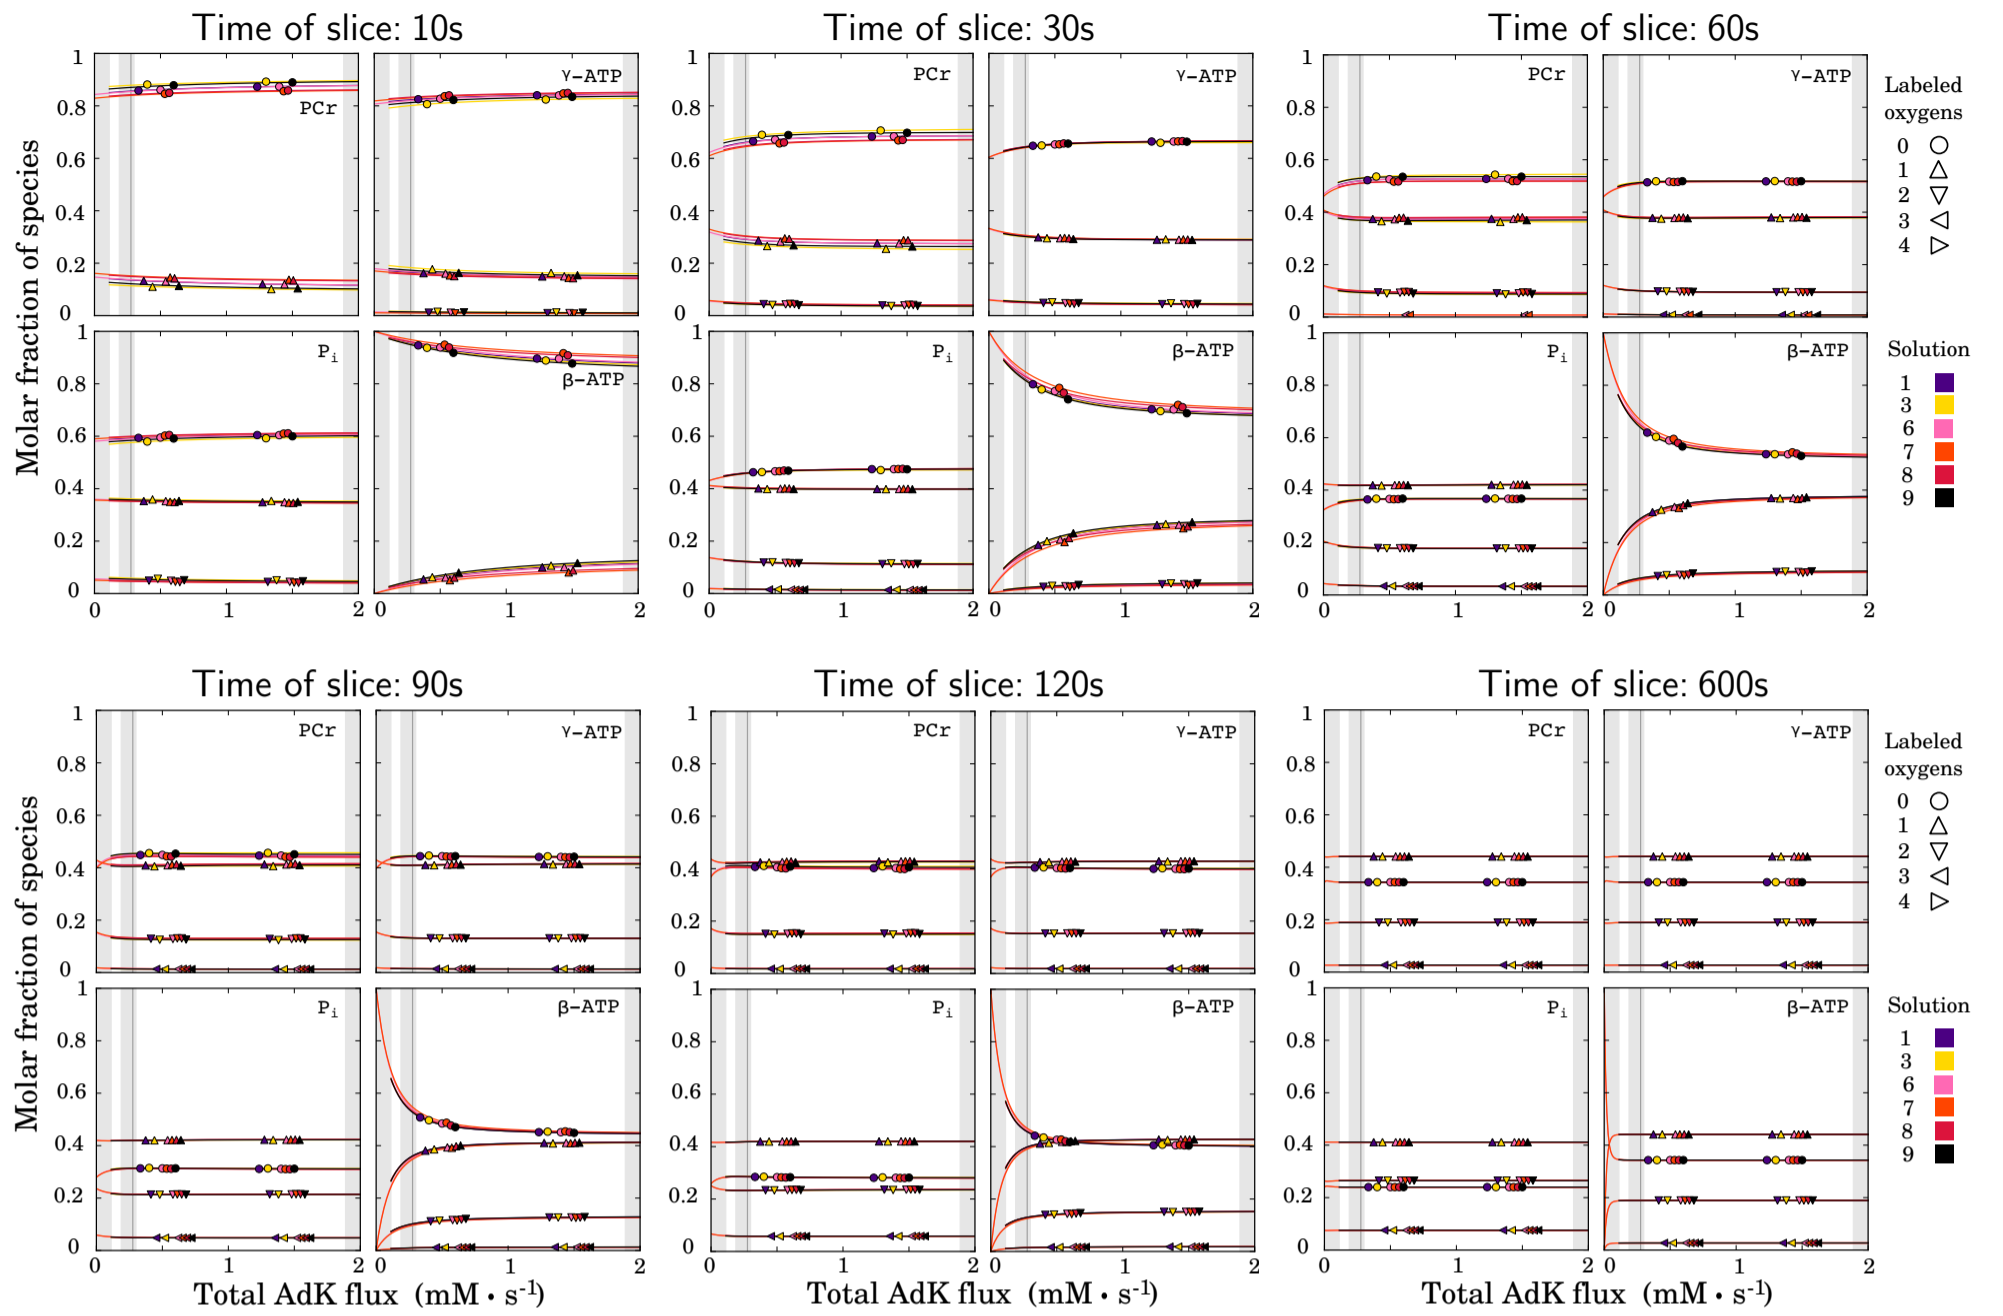

B

Figure S2B — Step to 100%  $\text{H}_2^{18}\text{O}$ .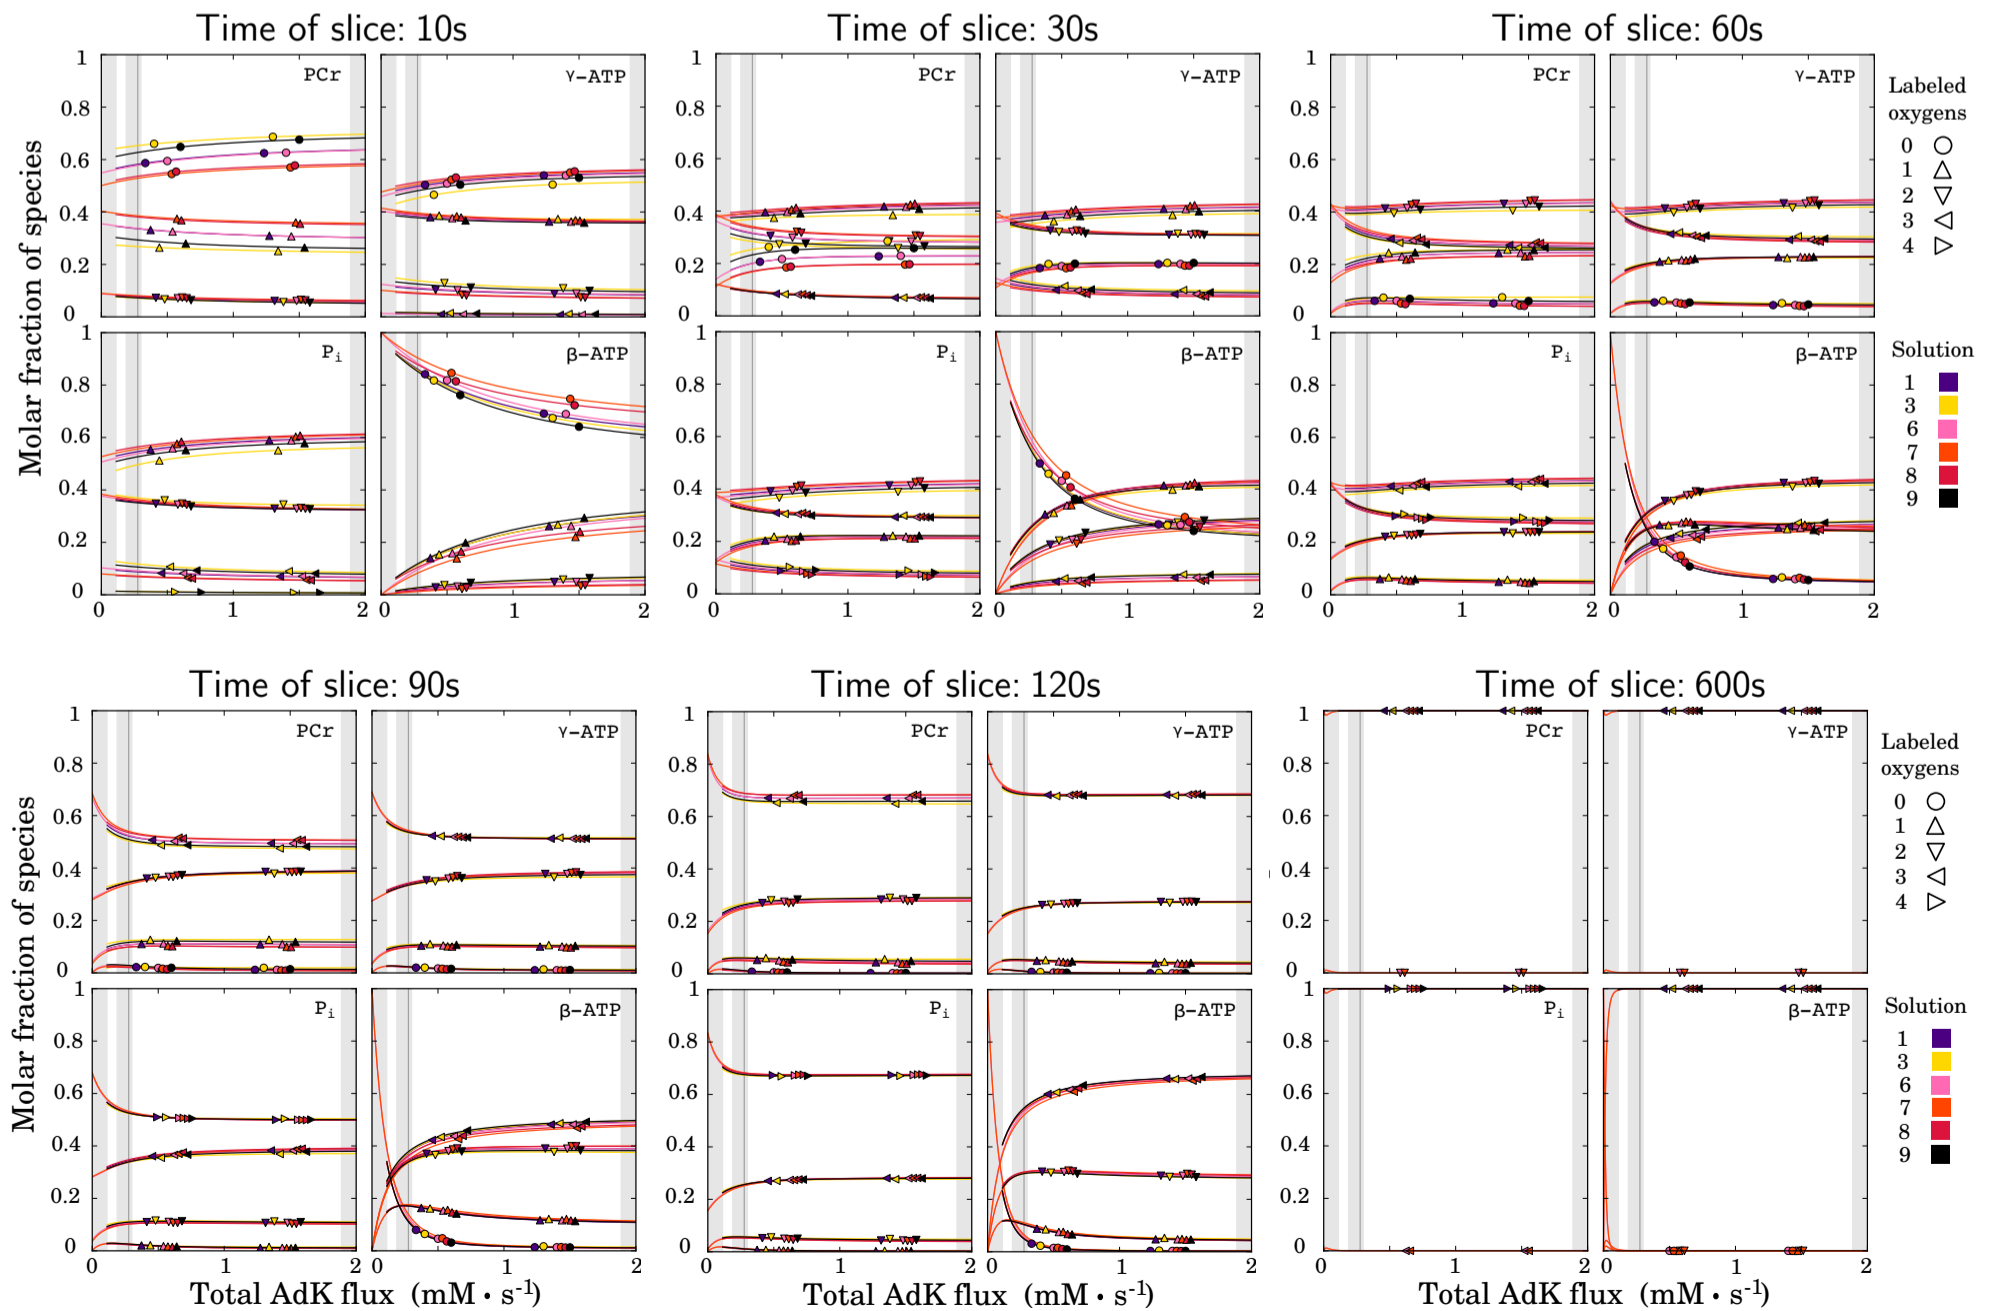

Supplement: S2 (10.1371/journal.pcbi.1002795.s002) [file journal.pcbi.1002795.s002]
